# Supplementary material for: An ultrasensitive label-free immunoassay for C-reactive protein detection in human serum based on electron transfer
Source: Royal Society of Chemistry journal article supplement (doi:10.1039/c6ay01464j), 2016-01-01
Supplement: c6ay01464j1.pdf [file c6ay01464j1.pdf]

## **Electronic Supplementary Information (ESI)**

*for*

### **Ultrasensitive Label-Free Immunoassay for C-reactive protein Detection in Human Serum based on the electron transfer**

Xi Zhang, Rong Hu\*, Kunlei Zhang, Ruyan Bai, Delei Li, Yunhui Yang\*

College of Chemistry and Chemical Engineering, Yunnan Normal University,  
Kunming, 650092, China

#### **Table of Contents**

1. Supplementary figures

|                |   |
|----------------|---|
| Table S1 ..... | 2 |
|----------------|---|

**Table S1. Analytical Performance of correlative methods for CRP detection**

|                                                                                                                                                           | <b>Linear Range</b>             | <b>Detection Limit</b> | <b>Reference</b>                                     |
|-----------------------------------------------------------------------------------------------------------------------------------------------------------|---------------------------------|------------------------|------------------------------------------------------|
| <b>Simultaneous photoelectrochemical immunoassay of dual cardiac markers using specific enzyme tags: a proof of principle for multiplexed bioanalysis</b> | 50 ng/mL to 50 $\mu$ g/mL       | 50 ng/mL               | <i>Anal. Chem.</i> , 2016, 88, 1990-1994             |
| <b>On-chip determination of C-Reactive protein using magnetic particles in continuous flow</b>                                                            | 1-10 $\mu$ g/mL                 | 0.87 $\mu$ g/mL        | <i>Anal. Chem.</i> , 2014, 86, 10552-10559           |
| <b>Low-cost nanoribbon sensors for protein analysis in human serum using a miniature bead-based enzyme-linked immunosorbent assay</b>                     | 0.2-500 ng/mL                   | 0.05 ng/mL             | <i>Anal. Chem.</i> , 2016, 88, 4872-4878             |
| <b>A pressure-based bioassay for the rapid, portable and quantitative detection of C-reactive protein</b>                                                 | 0. 25 ng/mL to 0.025 $\mu$ g/mL | 0. 2 ng/mL             | <i>Chem. Commun.</i> , 2016, DOI: 10.1039/C6CC03705D |
| <b>Ultrasensitive label-free immunoassay for C-reactive protein detection in human serum based on the electron transfer</b>                               | 0.2 -80 ng/mL                   | 40 pg/mL               | This work                                            |
